# Supplementary material for: Multitasking Pharmacophores Support Cabotegravir-Based Long-Acting HIV Pre-Exposure Prophylaxis (PrEP)
Source: MDPI journal article supplement (doi:10.3390/molecules29020376), 2024-01-11

# **Supporting Information for**

## **Multitasking pharmacophores support cabotegravir-based long-acting HIV Pre-Exposure Prophylaxis (PrEP)**

Zheng Wan<sup>1</sup>, Man Shi<sup>1</sup>, Yanqing Gong<sup>2</sup>, Massimo Lucci<sup>3</sup>, Jinjin Li<sup>4</sup>,  
Jiahai Zhou<sup>5</sup>, Xiao-Liang Yang<sup>\*6</sup>, Moreno Lelli<sup>3,7\*</sup>,  
Xiao He<sup>1,8\*</sup>, Jiafei Mao<sup>9,10\*</sup>

<sup>1</sup> Shanghai Engineering Research Center of Molecular Therapeutics and New Drug Development, Shanghai Frontiers Science Center of Molecule Intelligent Syntheses, School of Chemistry and Molecular Engineering, East China Normal University, Shanghai, 200062, China

<sup>2</sup> State Key Laboratory of New Drug and Pharmaceutical Process, Shanghai Institute of Pharmaceutical Industry, China State Institute of Pharmaceutical Industry, 285 Gebaini Road, Shanghai, 201203, China

<sup>3</sup> C.I.R.M.M.P. - Consorzio Interuniversitario Risonanze Magnetiche di Metallo Proteine, Via L. Sacconi 6, 50019 Sesto Fiorentino, Firenze, Italy

<sup>4</sup> Key Laboratory for Thin Film and Microfabrication of Ministry of Education, Department of Micro/Nano-electronics, Shanghai Jiao Tong University, Shanghai, 200240, China

<sup>5</sup> CAS Key Laboratory of Quantitative Engineering Biology, Shenzhen Institute of Synthetic Biology, Shenzhen Institute of Advanced Technology, Chinese Academy of Sciences, Shenzhen, 518055, China

<sup>6</sup> State Key Laboratory of Coordination Chemistry and Jiangsu Key Laboratory of Advanced Organic Materials, School of Chemistry and Chemical Engineering, Nanjing University, Nanjing, 210023, China

<sup>7</sup> Department of Chemistry “Ugo Schiff”, Magnetic Resonance Center (CERM) University of Florence, Via della Lastruccia 3, 50019 Sesto Fiorentino, Florence, Italy

<sup>8</sup> New York University–East China Normal University Center for Computational Chemistry, New York University Shanghai, Shanghai, 200062, China

<sup>9</sup> Beijing National Laboratory for Molecular Sciences (BNLMS), Institute of Chemistry, Chinese Academy of Sciences, Zhongguancun North First Street 2, 100190 Beijing, China

<sup>10</sup> Center for Physicochemical Analysis and Measurement, Institute of Chemistry, Chinese Academy of Science, Zhongguancun North First Street 2, 100190 Beijing, China

\*Correspondence to:

Jiafei Mao ([jmao2023@iccas.ac.cn](mailto:jmao2023@iccas.ac.cn)),  
Xiao He ([xiaohe@phy.ecnu.edu.cn](mailto:xiaohe@phy.ecnu.edu.cn)),  
Moreno Lelli ([moreno.elli@unifi.it](mailto:moreno.elli@unifi.it)),  
Xiaoliang Yang ([yxlnmr@nju.edu.cn](mailto:yxlnmr@nju.edu.cn))

**Table S1** The atomic coordinates ( $10^{-4}$  Å) and equivalent isotropic displacements ( $10^{-3}$  Å<sup>2</sup>) of GSK744 crystal.

| Atom   | x        | y       | z       | U(eq) |
|--------|----------|---------|---------|-------|
| F(1)   | 164(2)   | -392(2) | 5119(1) | 44(1) |
| F(2)   | -42(3)   | 5755(2) | 5510(1) | 57(1) |
| O(1)   | -1161(2) | 1631(2) | 3527(1) | 34(1) |
| O(2)   | 4639(2)  | 1466(2) | 3560(1) | 27(1) |
| O(3)   | 6588(2)  | 1690(2) | 2881(1) | 29(1) |
| O(4)   | 6537(2)  | 2725(2) | 2062(1) | 27(1) |
| O(5)   | 1411(2)  | 1559(2) | 1347(1) | 31(1) |
| N(1)   | 1344(2)  | 901(2)  | 3904(1) | 26(1) |
| N(2)   | 1995(2)  | 2090(2) | 2462(1) | 22(1) |
| N(3)   | 4014(2)  | 1581(2) | 1738(1) | 23(1) |
| C(1)   | 241(2)   | 1844(3) | 4596(1) | 25(1) |
| C(2)   | 164(3)   | 1402(3) | 5012(1) | 28(1) |
| C(3)   | 88(3)    | 2672(3) | 5326(1) | 34(1) |
| C(4)   | 71(3)    | 4470(3) | 5208(1) | 34(1) |
| C(5)   | 151(3)   | 5022(3) | 4802(1) | 34(1) |
| C(6)   | 238(3)   | 3691(3) | 4499(1) | 28(1) |
| C(7)   | 306(3)   | 366(3)  | 4268(1) | 30(1) |
| C(8)   | 523(3)   | 1441(3) | 3554(1) | 23(1) |
| C(9)   | 1775(2)  | 1742(2) | 3194(1) | 22(1) |
| C(10)  | 3732(3)  | 1673(2) | 3232(1) | 22(1) |
| C(11)  | 4756(3)  | 1839(2) | 2848(1) | 22(1) |
| C(12)  | 3908(2)  | 2040(3) | 2474(1) | 21(1) |
| C(13)  | 4951(3)  | 2162(2) | 2073(1) | 22(1) |
| C(14)  | 4603(3)  | 1931(3) | 1307(1) | 24(1) |
| C(15)  | 2939(3)  | 1167(3) | 1080(1) | 31(1) |
| C(16)  | 2039(3)  | 1151(3) | 1749(1) | 23(1) |
| C(17)  | 1089(3)  | 2367(3) | 2059(1) | 24(1) |
| C(18)  | 1001(3)  | 1959(3) | 2810(1) | 22(1) |
| C(19)  | 6398(3)  | 1031(3) | 1185(1) | 31(1) |
| H(3A)  | 6887     | 1716    | 3132    | 44    |
| H(1A)  | 2549     | 869     | 3913    | 31    |
| H(3B)  | 49       | 2318    | 5608    | 41    |
| H(5A)  | 148      | 6286    | 4731    | 40    |
| H(6A)  | 297      | 4052    | 4217    | 34    |
| H(7A)  | 863      | -750    | 4389    | 35    |
| H(7B)  | -961     | 58      | 4184    | 35    |
| H(14A) | 4686     | 3282    | 1259    | 29    |
| H(15A) | 2784     | 1773    | 809     | 37    |
| H(15B) | 3067     | -169    | 1036    | 37    |
| H(16A) | 1835     | -171    | 1816    | 28    |
| H(17A) | 1185     | 3666    | 1974    | 29    |
| H(17B) | -225     | 2041    | 2079    | 29    |
| H(18A) | -296     | 2019    | 2790    | 27    |
| H(19A) | 6683     | 1333    | 897     | 46    |
| H(19B) | 7382     | 1481    | 1364    | 46    |
| H(19C) | 6289     | -300    | 1215    | 46    |

**Table S2** The measured bond lengths (Å) and angles (degree) for the GSK744 crystal.

| Atoms            | Bond length | Atoms               | Bond length |
|------------------|-------------|---------------------|-------------|
| F(1)-C(2)        | 1.355(2)    | C(5)-C(6)           | 1.381(3)    |
| F(2)-C(4)        | 1.357(2)    | C(5)-H(5A)          | 0.9500      |
| O(1)-C(8)        | 1.240(2)    | C(6)-H(6A)          | 0.9500      |
| O(2)-C(10)       | 1.260(2)    | C(7)-H(7A)          | 0.9900      |
| O(3)-C(11)       | 1.346(2)    | C(7)-H(7B)          | 0.9900      |
| O(3)-H(3A)       | 0.8400      | C(8)-C(9)           | 1.495(2)    |
| O(4)-C(13)       | 1.229(2)    | C(9)-C(18)          | 1.374(2)    |
| O(5)-C(16)       | 1.409(2)    | C(9)-C(10)          | 1.435(3)    |
| O(5)-C(15)       | 1.440(2)    | C(10)-C(11)         | 1.454(3)    |
| N(1)-C(8)        | 1.340(2)    | C(11)-C(12)         | 1.365(3)    |
| N(1)-C(7)        | 1.455(2)    | C(12)-C(13)         | 1.507(3)    |
| N(1)-H(1A)       | 0.8800      | C(14)-C(19)         | 1.518(3)    |
| N(2)-C(18)       | 1.342(2)    | C(14)-C(15)         | 1.525(3)    |
| N(2)-C(12)       | 1.397(2)    | C(14)-H(14A)        | 1.0000      |
| N(2)-C(17)       | 1.476(2)    | C(15)-H(15A)        | 0.9900      |
| N(3)-C(13)       | 1.350(2)    | C(15)-H(15B)        | 0.9900      |
| N(3)-C(16)       | 1.476(2)    | C(16)-C(17)         | 1.509(3)    |
| N(3)-C(14)       | 1.481(2)    | C(16)-H(16A)        | 1.0000      |
| C(1)-C(6)        | 1.384(3)    | C(17)-H(17A)        | 0.9900      |
| C(1)-C(2)        | 1.385(3)    | C(17)-H(17B)        | 0.9900      |
| C(1)-C(7)        | 1.513(3)    | C(18)-H(18A)        | 0.9500      |
| C(2)-C(3)        | 1.375(3)    | C(19)-H(19A)        | 0.9800      |
| C(3)-C(4)        | 1.367(3)    | C(19)-H(19B)        | 0.9800      |
| C(3)-H(3B)       | 0.9500      | C(19)-H(19C)        | 0.9800      |
| C(4)-C(5)        | 1.376(3)    |                     |             |
|                  |             |                     |             |
| Atoms            | Angle       | Atoms               | Angle       |
| C(11)-O(3)-H(3A) | 109.5       | C(3)-C(2)-C(1)      | 124.17(19)  |
| C(16)-O(5)-C(15) | 105.01(14)  | C(4)-C(3)-C(2)      | 116.26(18)  |
| C(8)-N(1)-C(7)   | 122.03(17)  | C(4)-C(3)-H(3B)     | 121.9       |
| C(8)-N(1)-H(1A)  | 119.0       | C(2)-C(3)-H(3B)     | 121.9       |
| C(7)-N(1)-H(1A)  | 119.0       | F(2)-C(4)-C(3)      | 117.69(19)  |
| C(18)-N(2)-C(12) | 121.00(15)  | F(2)-C(4)-C(5)      | 119.2(2)    |
| C(18)-N(2)-C(17) | 120.50(15)  | C(3)-C(4)-C(5)      | 123.14(19)  |
| C(12)-N(2)-C(17) | 118.45(15)  | C(4)-C(5)-C(6)      | 118.23(19)  |
| C(13)-N(3)-C(16) | 122.86(15)  | C(4)-C(5)-H(5A)     | 120.9       |
| C(13)-N(3)-C(14) | 123.66(15)  | C(6)-C(5)-H(5A)     | 120.9       |
| C(16)-N(3)-C(14) | 110.05(14)  | C(5)-C(6)-C(1)      | 121.68(18)  |
| C(6)-C(1)-C(2)   | 116.53(18)  | C(5)-C(6)-H(6A)     | 119.2       |
| C(6)-C(1)-C(7)   | 122.45(17)  | C(1)-C(6)-H(6A)     | 119.2       |
| C(2)-C(1)-C(7)   | 121.02(18)  | N(1)-C(7)-C(1)      | 113.07(16)  |
| F(1)-C(2)-C(3)   | 117.55(17)  | N(1)-C(7)-H(7A)     | 109.0       |
| F(1)-C(2)-C(1)   | 118.28(17)  | C(1)-C(7)-H(7A)     | 109.0       |
| N(1)-C(7)-H(7B)  | 109.0       | O(5)-C(15)-C(14)    | 104.82(14)  |
| C(1)-C(7)-H(7B)  | 109.0       | O(5)-C(15)-H(15A)   | 110.8       |
| H(7A)-C(7)-H(7B) | 107.8       | C(14)-C(15)-H(15A)  | 110.8       |
| O(1)-C(8)-N(1)   | 122.36(17)  | O(5)-C(15)-H(15B)   | 110.8       |
| O(1)-C(8)-C(9)   | 122.38(16)  | C(14)-C(15)-H(15B)  | 110.8       |
| N(1)-C(8)-C(9)   | 115.22(16)  | H(15A)-C(15)-H(15B) | 108.9       |

|                    |            |                     |            |
|--------------------|------------|---------------------|------------|
| C(18)-C(9)-C(10)   | 119.29(16) | O(5)-C(16)-N(3)     | 104.53(14) |
| C(18)-C(9)-C(8)    | 117.93(16) | O(5)-C(16)C(17)     | 109.83(15) |
| C(10)-C(9)-C(8)    | 122.61(16) | N(3)-C(16)-C(17)    | 109.84(15) |
| O(2)-C(10)-C(9)    | 126.72(17) | O(5)-C(16)-H(16A)   | 110.8      |
| O(2)-C(10)-C(11)   | 117.33(16) | N(3)-C(16)-H(16A)   | 110.8      |
| C(9)-C(10)-C(11)   | 115.94(16) | C(17)-C(16)-H(16A)  | 110.8      |
| O(3)-C(11)-C(12)   | 121.99(16) | N(2)-C(17)-C(16)    | 107.51(15) |
| O(3)-C(11)-C(10)   | 115.84(15) | N(2)-C(17)-H(17A)   | 110.2      |
| C(12)-C(11)-C(10)  | 122.09(17) | C(16)-C(17)-H(17A)  | 110.2      |
| C(11)-C(12)-N(2)   | 118.73(16) | N(2)-C(17)-H(17B)   | 110.2      |
| C(11)-C(12)-C(13)  | 122.64(17) | C(16)-C(17)H(17B)   | 110.2      |
| N(2)-C(12)-C(13)   | 118.62(16) | H(17A)-C(17)-H(17B) | 108.5      |
| O(4)-C(13)-N(3)    | 123.93(17) | N(2)-C(18)-C(9)     | 122.95(17) |
| O(4)-C(13)-C(12)   | 121.41(16) | N(2)-C(18)-H(18A)   | 118.5      |
| N(3)-C(13)-C(12)   | 114.65(16) | C(9)-C(18)-H(18A)   | 118.5      |
| N(3)-C(14)-C(19)   | 114.89(15) | C(14)-C(19)-H(19A)  | 109.5      |
| N(3)-C(14)-C(15)   | 99.11(14)  | C(14)-C(19)-H(19B)  | 109.5      |
| C(19)-C(14)-H(14A) | 113.85(16) | H(19A)-C(19)-H(19B) | 109.5      |
| N(3)-C(14)H(14A)   | 109.5      | C(14)-C(19)-H(19C)  | 109.5      |
| C(19)-C(14)-H(14A) | 109.5      | H(19A)-C(19)-H(19C) | 109.5      |
| C(15)-C(14)-H(14A) | 109.5      | H(19B)-C(19)-H(19C) | 109.5      |

**Table S3** The measured torsional angles [degree] for the GSK744 crystal.

|                         |             |
|-------------------------|-------------|
| C(6)-C(1)-C(2)-F(1)     | 180.00(19)  |
| C(7)-C(1)-C(2)-F(1)     | 0.6(3)      |
| C(6)-C(1)-C(2)-C(3)     | -0.1(3)     |
| C(7)-C(1)-C(2)-C(3)     | -179.5(2)   |
| F(1)-C(2)-C(3)-C(4)     | -179.4(2)   |
| C(1)-C(2)-C(3)-C(4)     | 0.7(4)      |
| C(2)-C(3)-C(4)-F(2)     | 178.7(2)    |
| C(2)-C(3)-C(4)-C(5)     | -0.9(4)     |
| F(2)-C(4)-C(5)-C(6)     | -179.0(2)   |
| C(3)-C(4)-C(5)-C(6)     | 0.5(4)      |
| C(4)-C(5)-C(6)-C(1)     | 0.1(4)      |
| C(2)-C(1)-C(6)-C(5)     | -0.3(3)     |
| C(7)-C(1)-C(6)-C(5)     | 179.0(2)    |
| C(8)-N(1)-C(7)-C(1)     | -101.8(2)   |
| C(6)-C(1)-C(7)-N(1)     | 32.6(3)     |
| C(2)-C(1)-C(7)-N(1)     | -148.08(19) |
| C(7)-N(1)-C(8)-O(1)     | 4.7(3)      |
| C(7)-N(1)-C(8)-C(9)     | -173.43(16) |
| O(1)-C(8)-C(9)-C(18)    | -10.1(3)    |
| N(1)-C(8)-C(9)-C(18)    | 168.05(17)  |
| O(1)-C(8)-C(9)-C(10)    | 174.70(19)  |
| N(1)-C(8)-C(9)-C(10)    | -7.2(3)     |
| C(18)-C(9)-C(10)-O(2)   | -179.37(18) |
| C(8)-C(9)-C(10)-O(2)    | -4.2(3)     |
| C(18)-C(9)-C(10)-C(11)  | -0.2(3)     |
| C(8)-C(9)-C(10)-C(11)   | 174.96(16)  |
| O(2)-C(10)-C(11)-O(3)   | 2.2(2)      |
| C(9)-C(10)-C(11)-O(3)   | -177.07(16) |
| O(2)-C(10)-C(11)-C(12)  | 179.00(18)  |
| C(9)-C(10)-C(11)-C(12)  | -0.3(3)     |
| O(3)-C(11)-C(12)-N(2)   | 176.70(17)  |
| C(10)-C(11)-C(12)-N(2)  | 0.1(3)      |
| O(3)-C(11)-C(12)-C(13)  | -1.7(3)     |
| C(10)-C(11)-C(12)-C(13) | -178.30(16) |
| C(18)-N(2)-C(12)-C(11)  | 0.6(3)      |
| C(17)-N(2)-C(12)-C(11)  | 178.06(16)  |
| C(18)-N(2)-C(12)-C(13)  | 179.01(16)  |
| C(17)-N(2)-C(12)-C(13)  | -3.5(2)     |
| C(16)-N(3)-C(13)-O(4)   | -171.40(17) |
| C(14)-N(3)-C(13)-O(4)   | -14.4(3)    |
| C(16)-N(3)-C(13)-C(12)  | 9.7(3)      |
| C(14)-N(3)-C(13)-C(12)  | 166.71(16)  |
| C(11)-C(12)-C(13)-O(4)  | -26.0(3)    |
| N(2)-C(12)-C(13)-O(4)   | 155.58(18)  |
| C(11)-C(12)-C(13)-N(3)  | 152.89(18)  |
| N(2)-C(12)-C(13)-N(3)   | -25.5(2)    |
| C(13)-N(3)-C(14)-C(19)  | 64.4(2)     |
| C(16)-N(3)-C(14)-C(19)  | -136.01(17) |
| C(13)-N(3)-C(14)-C(15)  | -173.83(18) |
| C(16)-N(3)-C(14)-C(15)  | -14.28(19)  |

|                        |             |
|------------------------|-------------|
| C(16)-O(5)-C(15)-C(14) | -42.22(19)  |
| N(3)-C(14)-C(15)-O(5)  | 33.47(18)   |
| C(19)-C(14)-C(15)-O(5) | 155.95(16)  |
| C(15)-O(5)-C(16)-N(3)  | 31.90(19)   |
| C(15)-O(5)-C(16)-C(17) | 149.68(16)  |
| C(13)-N(3)-C(16)-O(5)  | 149.70(17)  |
| C(14)-N(3)-C(16)-O(5)  | -10.0(2)    |
| C(13)-N(3)-C(16)-C(17) | 31.9(2)     |
| C(14)-N(3)-C(16)-C(17) | -127.83(16) |
| C(18)-N(2)-C(17)-C(16) | -138.09(17) |
| C(12)-N(2)-C(17)-C(16) | 44.4(2)     |
| O(5)-C(16)-C(17)-N(2)  | -171.32(14) |
| N(3)-C(16)-C(17)-N(2)  | -56.88(19)  |
| C(12)-N(2)-C(18)-C(9)  | -1.0(3)     |
| C(17)-N(2)-C(18)-C(9)  | -178.51(17) |
| C(10)-C(9)-C(18)-N(2)  | 0.8(3)      |

**Table S4** The measured hydrogen bonds for the GSK744 crystal.

| <b>D-H...A</b>    | <b>d(D-H)<br/>(Å)</b> | <b>d(H...A)<br/>(Å)</b> | <b>d(D...A)<br/>(Å)</b> | <b>&lt;(DHA)<br/>(degree)</b> |
|-------------------|-----------------------|-------------------------|-------------------------|-------------------------------|
| O(3)-H(3A)...O(1) | 0.84                  | 1.92                    | 2.6587(18)              | 146.8                         |
| O(3)-H(3A)...O(2) | 0.84                  | 2.16                    | 2.6215(18)              | 114.9                         |
| N(1)-H(1A)...O(2) | 0.88                  | 1.96                    | 2.682(2)                | 138.8                         |

**Table S5** The comparison of calculated and observed chemical shifts for  $^{13}\text{C}$  atoms. All values are in ppm.

| Atom        | Chemical shift<br>(crystal,<br>SSNMR) | Chemical shift<br>(crystal,<br>AF-QM/MM) | Chemical shift<br>(solution,<br>NMR) | Chemical shift<br>(solution,<br>DFT) |
|-------------|---------------------------------------|------------------------------------------|--------------------------------------|--------------------------------------|
| <b>C2</b>   | 74.5                                  | 76.5                                     | 72.4                                 | 74.5                                 |
| <b>C3</b>   | 56.1                                  | 57.1                                     | 52.9                                 | 57.0                                 |
| <b>C5</b>   | 155.8                                 | 154.2                                    | 158.9                                | 155.3                                |
| <b>C6</b>   | 152.0                                 | 152.0                                    | 153.1                                | 149.0                                |
| <b>C7</b>   | 172.6                                 | 170.5                                    | 170.4                                | 168.1                                |
| <b>C8</b>   | 114.8                                 | 117.1                                    | 114.9                                | 114.7                                |
| <b>C9</b>   | 139.2                                 | 137.7                                    | 141.5                                | 139.2                                |
| <b>C10a</b> | 118.9                                 | 119.9                                    | 117.4                                | 118.8                                |
| <b>C11</b>  | 53.7                                  | 58.1                                     | 51.4                                 | 59.0                                 |
| <b>C11a</b> | 84.0                                  | 85.9                                     | 81.7                                 | 86.6                                 |
| <b>C12</b>  | 14.0                                  | 17.5                                     | 16.6                                 | 16.7                                 |
| <b>C13</b>  | 166.7                                 | 165.1                                    | 163.6                                | 163.8                                |
| <b>C15</b>  | 34.3                                  | 39.7                                     | 35.8                                 | 38.6                                 |
| <b>C16</b>  | 122.8                                 | 123.2                                    | 122.4                                | 123.2                                |
| <b>C17</b>  | 158.6                                 | 157.6                                    | 160.2                                | 158.9                                |
| <b>C18</b>  | 103.2                                 | 104.3                                    | 103.8                                | 102.9                                |
| <b>C19</b>  | 161.4                                 | 160.2                                    | 161.5                                | 160.6                                |
| <b>C20</b>  | 110.2                                 | 109.2                                    | 111.4                                | 109.9                                |
| <b>C21</b>  | 129.3                                 | 127.8                                    | 130.8                                | 127.9                                |

**Table S6** The comparison of calculated and observed chemical shifts for  $^1\text{H}$  atoms. All values are in ppm.

| <b>Atom</b> | <b>Chemical shift<br/>(crystal,<br/>SSNMR)</b> | <b>Chemical shift<br/>(crystal,<br/>AF-QM/MM)</b> | <b>Chemical shift<br/>(solution,<br/>NMR)</b> | <b>Chemical shift<br/>(solution,<br/>DFT)</b> |
|-------------|------------------------------------------------|---------------------------------------------------|-----------------------------------------------|-----------------------------------------------|
| <b>H2</b>   | 4.20                                           | 4.27                                              | 4.03<br>(3.66,4.4)                            | 4.28                                          |
| <b>H3</b>   | 3.97                                           | 4.88                                              | 4.30                                          | 4.32                                          |
| <b>H9</b>   | 8.80                                           | 8.90                                              | 8.47                                          | 8.34                                          |
| <b>H11</b>  | 4.76                                           | 4.37                                              | 4.45<br>(4.01,4.89)                           | 4.32                                          |
| <b>H11a</b> | 5.79                                           | 5.82                                              | 5.39                                          | 5.62                                          |
| <b>H12</b>  | 1.64                                           | 1.66                                              | 1.35                                          | 1.68                                          |
| <b>H14</b>  | 11.45                                          | 12.14                                             | 10.30                                         | 11.08                                         |
| <b>H15</b>  | 4.99                                           | 5.22                                              | 4.55                                          | 4.84                                          |
| <b>H18</b>  | 6.73                                           | 6.74                                              | 7.07                                          | 7.22                                          |
| <b>H20</b>  | 7.04                                           | 7.33                                              | 7.24                                          | 7.29                                          |
| <b>H21</b>  | 7.46                                           | 7.90                                              | 7.40                                          | 7.80                                          |



**Table S7** The performance of AF-QM/MM calculated  $^{13}\text{C}$  chemical shifts for the carbon set using different density functionals with the 6-31G\*\* basis set as compared to experimental results. MaxD denotes the maximum deviation. All values are in ppm.

| <b>Density functional</b> | <b>RMSE</b> | <b>MUE</b> | <b>MaxD</b> | <b>Ref.</b> |
|---------------------------|-------------|------------|-------------|-------------|
| <b>B3LYP</b>              | 2.6         | 2.3        | 4.2         | 191.7       |
| <b>B3PW91</b>             | 2.4         | 2.0        | 5.0         | 194.9       |
| <b>mPW1PW91</b>           | 2.1         | 1.6        | 5.1         | 196.2       |
| <b>M06-L</b>              | 8.7         | 8.3        | 14.6        | 193.7       |
| <b>M06-2X</b>             | 11.5        | 10.5       | 15.4        | 196.7       |
| <b>OB98</b>               | 7.2         | 6.3        | 13.3        | 192.0       |
| <b>OPBE</b>               | 7.3         | 6.1        | 13.4        | 195.5       |

**Table S8** The performance of AF-QM/MM calculated  $^1\text{H}$  chemical shifts for the carbon set using different density functionals with the 6-31G\*\* basis set as compared to experimental results. MaxD denotes the maximum deviation. All values are in ppm.

| <b>Density functional</b> | <b>RMSE</b> | <b>MUE</b> | <b>MaxD</b> | <b>Ref.</b> |
|---------------------------|-------------|------------|-------------|-------------|
| <b>B3LYP</b>              | 0.38        | 0.26       | 0.85        | 31.75       |
| <b>B3PW91</b>             | 0.41        | 0.30       | 0.83        | 31.70       |
| <b>mPW1PW91</b>           | 0.44        | 0.34       | 0.86        | 31.75       |
| <b>M06-L</b>              | 0.83        | 0.74       | 1.39        | 31.97       |
| <b>M06-2X</b>             | 0.94        | 0.81       | 1.90        | 31.87       |
| <b>OB98</b>               | 0.38        | 0.31       | 0.73        | 31.64       |
| <b>OPBE</b>               | 0.38        | 0.33       | 0.62        | 31.53       |

**Table S9** Comparison of  $^{13}\text{C}$  chemical shifts between solid-state and solution samples and between experiments and DFT calculations at the mPW1PW91/6-31G\*\* level, and considering the Influence of DMSO Solvent Effects to Ensure Consistency with Experimental Conditions. The chemical shift differences are in ppm.

| <b>Atom</b> | <b><math>\Delta\delta(^{13}\text{C})</math><br/>(solution/exp<br/>vs. crystal/exp)</b> | <b><math>\Delta\delta(^{13}\text{C})</math><br/>(crystal/exp<br/>vs. crystal/calc)</b> | <b><math>\Delta\delta(^{13}\text{C})</math><br/>(solution/exp<br/>vs. solution/calc)</b> | <b><math>\Delta\delta(^{13}\text{C})</math><br/>(solution/calc<br/>vs. crystal/calc)</b> |
|-------------|----------------------------------------------------------------------------------------|----------------------------------------------------------------------------------------|------------------------------------------------------------------------------------------|------------------------------------------------------------------------------------------|
| <b>C2</b>   | -2.1                                                                                   | -2                                                                                     | -2.1                                                                                     | -2.0                                                                                     |
| <b>C3</b>   | -3.2                                                                                   | -1                                                                                     | -4.1                                                                                     | -0.1                                                                                     |
| <b>C5</b>   | 3.1                                                                                    | 1.6                                                                                    | 3.6                                                                                      | 1.0                                                                                      |
| <b>C6</b>   | 1.1                                                                                    | 0                                                                                      | 4.1                                                                                      | -3.0                                                                                     |
| <b>C7</b>   | -2.2                                                                                   | 2.1                                                                                    | 2.3                                                                                      | -2.4                                                                                     |
| <b>C8</b>   | 0.1                                                                                    | -2.3                                                                                   | 0.2                                                                                      | -2.5                                                                                     |
| <b>C9</b>   | 2.3                                                                                    | 1.5                                                                                    | 2.3                                                                                      | 1.4                                                                                      |
| <b>C10a</b> | -1.5                                                                                   | -1                                                                                     | -1.4                                                                                     | -1.1                                                                                     |
| <b>C11</b>  | -2.3                                                                                   | -4.4                                                                                   | -7.6                                                                                     | 0.9                                                                                      |
| <b>C11a</b> | -2.3                                                                                   | -1.9                                                                                   | -4.9                                                                                     | 0.7                                                                                      |
| <b>C12</b>  | 2.6                                                                                    | -3.5                                                                                   | -0.1                                                                                     | -0.7                                                                                     |
| <b>C13</b>  | -3.1                                                                                   | 1.6                                                                                    | -0.2                                                                                     | -1.3                                                                                     |
| <b>C15</b>  | 1.5                                                                                    | -5.4                                                                                   | -2.8                                                                                     | -1.1                                                                                     |
| <b>C16</b>  | -0.4                                                                                   | -0.4                                                                                   | -0.8                                                                                     | 0.0                                                                                      |
| <b>C17</b>  | 1.6                                                                                    | 1                                                                                      | 1.3                                                                                      | 1.3                                                                                      |
| <b>C18</b>  | 0.6                                                                                    | -1.1                                                                                   | 0.9                                                                                      | -1.4                                                                                     |
| <b>C19</b>  | 0.1                                                                                    | 1.2                                                                                    | 0.9                                                                                      | 0.4                                                                                      |
| <b>C20</b>  | 1.2                                                                                    | 1                                                                                      | 1.5                                                                                      | 0.7                                                                                      |
| <b>C21</b>  | 1.5                                                                                    | 1.5                                                                                    | 2.9                                                                                      | 0.1                                                                                      |

**Table S10** Comparison of  $^1\text{H}$  chemical shifts between solid-state and solution samples and between experiments and DFT calculations at the B3LYP/6-31G\*\* level, and considering the Influence of DMSO Solvent Effects to Ensure Consistency with Experimental Conditions. The chemical shift differences are in ppm.

| <b>Atom</b> | <b><math>\Delta\delta(^1\text{H})</math><br/>(solution/exp<br/>vs. crystal/exp)</b> | <b><math>\Delta\delta(^1\text{H})</math><br/>(crystal/exp<br/>vs. crystal/calc)</b> | <b><math>\Delta\delta(^1\text{H})</math><br/>(solution/exp<br/>vs. solution/calc)</b> | <b><math>\Delta\delta(^1\text{H})</math><br/>(solution/calc<br/>vs. crystal/calc)</b> |
|-------------|-------------------------------------------------------------------------------------|-------------------------------------------------------------------------------------|---------------------------------------------------------------------------------------|---------------------------------------------------------------------------------------|
| <b>H2</b>   | -0.17                                                                               | -0.07                                                                               | -0.25                                                                                 | 0.01                                                                                  |
| <b>H3</b>   | 0.33                                                                                | -0.91                                                                               | -0.02                                                                                 | -0.55                                                                                 |
| <b>H9</b>   | -0.33                                                                               | -0.1                                                                                | 0.13                                                                                  | -0.56                                                                                 |
| <b>H11</b>  | -0.31                                                                               | 0.39                                                                                | 0.13                                                                                  | -0.05                                                                                 |
| <b>H11a</b> | -0.4                                                                                | -0.03                                                                               | -0.23                                                                                 | -0.19                                                                                 |
| <b>H12</b>  | -0.29                                                                               | -0.02                                                                               | -0.33                                                                                 | 0.01                                                                                  |
| <b>H14</b>  | -1.15                                                                               | -0.69                                                                               | -0.78                                                                                 | -1.06                                                                                 |
| <b>H15</b>  | -0.44                                                                               | -0.23                                                                               | -0.29                                                                                 | -0.37                                                                                 |
| <b>H18</b>  | 0.34                                                                                | -0.01                                                                               | -0.15                                                                                 | 0.48                                                                                  |
| <b>H20</b>  | 0.2                                                                                 | -0.29                                                                               | -0.05                                                                                 | -0.04                                                                                 |
| <b>H21</b>  | -0.06                                                                               | -0.44                                                                               | -0.4                                                                                  | -0.10                                                                                 |

**Table S11**  $^1\text{H}$  chemical shifts of cabotegravir in different solvents as obtained by NMR experiments.

| Atom        | $\delta(^1\text{H})$<br>(DMSO) | $\delta(^1\text{H})$<br>(DMSO<br>/D <sub>2</sub> O) | $\delta(^1\text{H})$<br>(D <sub>2</sub> O) | $\Delta\delta(^1\text{H})$<br>(DMSO/D <sub>2</sub> O<br>vs. DMSO) | $\Delta\delta(^1\text{H})$<br>(D <sub>2</sub> O vs.<br>DMSO) | $\Delta\delta(^1\text{H})$<br>(D <sub>2</sub> O vs.<br>(DMSO/D <sub>2</sub> O) |
|-------------|--------------------------------|-----------------------------------------------------|--------------------------------------------|-------------------------------------------------------------------|--------------------------------------------------------------|--------------------------------------------------------------------------------|
| <b>H2</b>   | 4.03<br>(3.66, 4.4)            | 3.65<br>(3.65, -)                                   | 4.065<br>(3.75,4.38)                       | -                                                                 | 0.035                                                        | -                                                                              |
| <b>H3</b>   | 4.3                            | -                                                   | -                                          | -                                                                 | -                                                            | -                                                                              |
| <b>H9</b>   | 8.47                           | 8.24                                                | 8.2                                        | -0.23                                                             | -0.27                                                        | -0.04                                                                          |
| <b>H11</b>  | 4.45<br>(4.01,<br>4.89)        | 3.95<br>(3.95, -)                                   | 4.04<br>(4.04, -)                          | -                                                                 | -                                                            | -                                                                              |
| <b>H11a</b> | 5.39                           | 5.32                                                | 5.41                                       | -0.07                                                             | 0.02                                                         | 0.09                                                                           |
| <b>H12</b>  | 1.35                           | 1.27                                                | 1.33                                       | -0.08                                                             | -0.02                                                        | 0.06                                                                           |
| <b>H14</b>  | 10.3                           | 10.38                                               | -                                          | 0.08                                                              | -                                                            | -                                                                              |
| <b>H15</b>  | 4.55                           | 4.6                                                 | 4.56                                       | 0.05                                                              | 0.01                                                         | -0.04                                                                          |
| <b>H18</b>  | 7.07                           | 6.93                                                | 6.92                                       | -0.14                                                             | -0.15                                                        | -0.01                                                                          |
| <b>H20</b>  | 7.24                           | 7.01                                                | -                                          | -0.23                                                             | -                                                            | -                                                                              |
| <b>H21</b>  | 7.4                            | 7.34                                                | 7.33                                       | -0.06                                                             | -0.07                                                        | -0.01                                                                          |

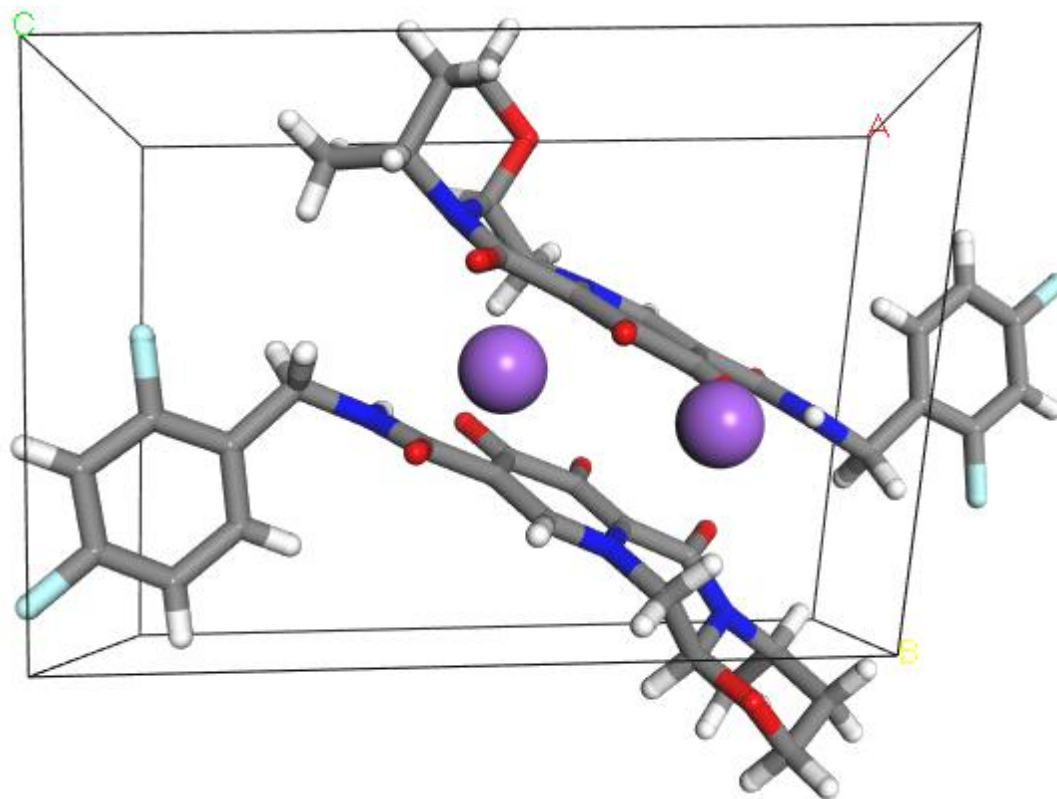

**Figure S1.** Crystal structure of sodium salt of dolutegravir (CSD Entry: KILNEA).

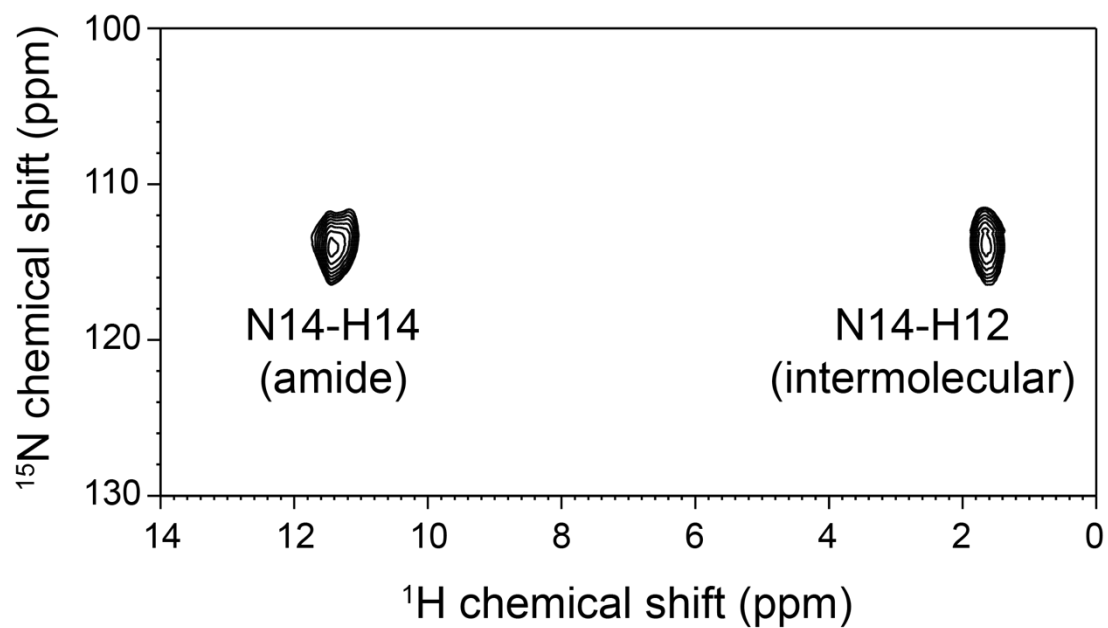

**Figure S2.**  $^1\text{H}$ - $^{15}\text{N}$  HSQC SSNMR spectra of cabotegravir microcrystalline powder acquired under VFMAS.

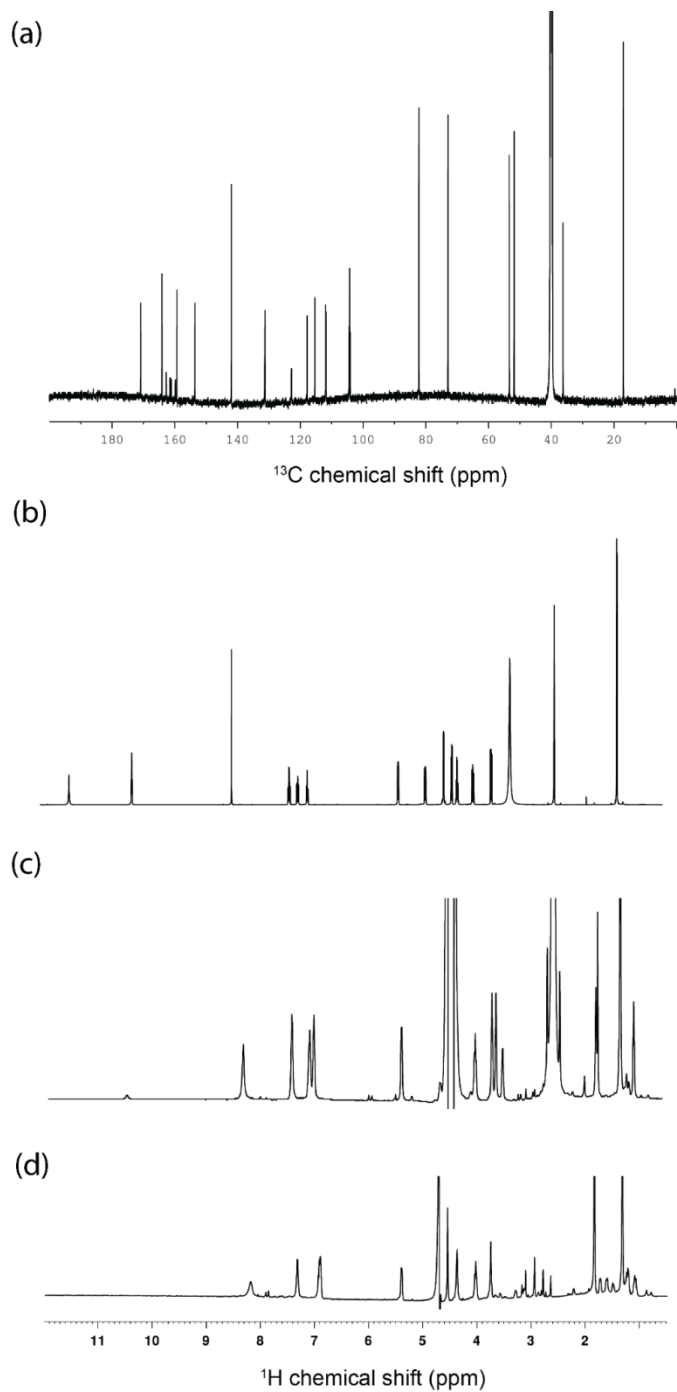

**Figure S3.**  $^{13}\text{C}$  and  $^1\text{H}$  solution NMR spectra of cabotegravir in different solvents: (a) DMSO solution, (b) DMSO solution, (c) DMSO/ $\text{D}_2\text{O}$  solution, (d) aqueous solution.

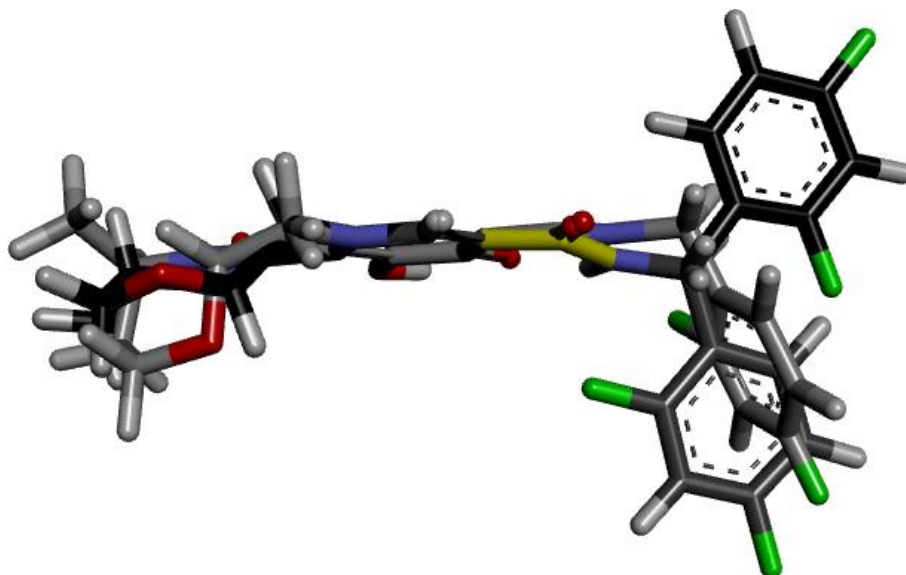

**Figure S4.** The comparison of the crystal structure of cabotegravir (dark gray), the best computed cabotegravir structural model in aqueous solution (middle gray) and the crystal structure of dolutegravir (light gray).

#### 570.CIF

data\_570

```
_audit_creation_method      'SHELXL-2018/3'
_shelx_SHELXL_version_number '2018/3'
_chemical_name_systematic    ?
_chemical_name_common        ?
_chemical_melting_point      ?
_chemical_formula_moiety     'C19 H17 F2 N3 O5'
_chemical_formula_sum        'C19 H17 F2 N3 O5'
_chemical_formula_weight     405.35
```

loop\_

```
_atom_type_symbol
_atom_type_description
_atom_type_scatter_dispersion_real
_atom_type_scatter_dispersion_imag
_atom_type_scatter_source
'C' 'C' 0.0181 0.0091
'International Tables Vol C Tables 4.2.6.8 and 6.1.1.4'
'H' 'H' 0.0000 0.0000
'International Tables Vol C Tables 4.2.6.8 and 6.1.1.4'
'N' 'N' 0.0311 0.0180
'International Tables Vol C Tables 4.2.6.8 and 6.1.1.4'
```



'O' 'O' 0.0492 0.0322  
 'International Tables Vol C Tables 4.2.6.8 and 6.1.1.4'  
 'F' 'F' 0.0727 0.0534  
 'International Tables Vol C Tables 4.2.6.8 and 6.1.1.4'

\_space\_group\_crystal\_system orthorhombic  
 \_space\_group\_IT\_number 19  
 \_space\_group\_name\_H-M\_alt 'P 21 21 21'  
 \_space\_group\_name\_Hall 'P 2ac 2ab'

\_shelx\_space\_group\_comment

;

The symmetry employed for this shelxl refinement is uniquely defined  
 by the following loop, which should always be used as a source of  
 symmetry information in preference to the above space-group names.  
 They are only intended as comments.

;

loop\_

\_space\_group\_symop\_operation\_xyz  
 'x, y, z'  
 '-x+1/2, -y, z+1/2'  
 '-x, y+1/2, -z+1/2'  
 'x+1/2, -y+1/2, -z'

\_cell\_length\_a 7.3002(5)  
 \_cell\_length\_b 7.30020(10)  
 \_cell\_length\_c 32.343(2)  
 \_cell\_angle\_alpha 90  
 \_cell\_angle\_beta 90  
 \_cell\_angle\_gamma 90  
 \_cell\_volume 1723.63(16)  
 \_cell\_formula\_units\_Z 4  
 \_cell\_measurement\_temperature 182(2)  
 \_cell\_measurement\_reflns\_used 9912  
 \_cell\_measurement\_theta\_min 5.47  
 \_cell\_measurement\_theta\_max 68.82

\_exptl\_crystal\_description prismatic  
 \_exptl\_crystal\_colour colorless  
 \_exptl\_crystal\_density\_meas ?  
 \_exptl\_crystal\_density\_method ?  
 \_exptl\_crystal\_density\_diffrn 1.562  
 \_exptl\_crystal\_F\_000 840  
 \_exptl\_transmission\_factor\_min ?  
 \_exptl\_transmission\_factor\_max ?  
 \_exptl\_crystal\_size\_max 0.260  
 \_exptl\_crystal\_size\_mid 0.140  
 \_exptl\_crystal\_size\_min 0.080  
 \_exptl\_absorpt\_coefficient\_mu 1.103  
 \_shelx\_estimated\_absorpt\_T\_min 0.762  
 \_shelx\_estimated\_absorpt\_T\_max 0.917  
 \_exptl\_absorpt\_correction\_type multi-scan  
 \_exptl\_absorpt\_correction\_T\_min 0.6369

```

_exptl_absorpt_correction_T_max 0.7531
_exptl_absorpt_process_details SADABS
_exptl_absorpt_special_details ?
_diffn_ambient_temperature 182(2)
_diffn_radiation_wavelength 1.54178
_diffn_radiation_type CuK\alpha
_diffn_source ?
_diffn_measurement_device_type 'Bruker APEX-II CCD'
_diffn_measurement_method '\f and \w scans'
_diffn_detector_area_resol_mean ?
_diffn_reflns_number 17089
_diffn_reflns_av_unetI/netI 0.0223
_diffn_reflns_av_R_equivalents 0.0349
_diffn_reflns_limit_h_min -8
_diffn_reflns_limit_h_max 8
_diffn_reflns_limit_k_min -8
_diffn_reflns_limit_k_max 8
_diffn_reflns_limit_l_min -31
_diffn_reflns_limit_l_max 39
_diffn_reflns_theta_min 5.471
_diffn_reflns_theta_max 68.809
_diffn_reflns_theta_full 67.679
_diffn_measured_fraction_theta_max 0.993
_diffn_measured_fraction_theta_full 0.994
_diffn_reflns_Laue_measured_fraction_max 0.993
_diffn_reflns_Laue_measured_fraction_full 0.994
_diffn_reflns_point_group_measured_fraction_max 0.994
_diffn_reflns_point_group_measured_fraction_full 0.996
_reflns_number_total 3165
_reflns_number_gt 3114
_reflns_threshold_expression 'I > 2\sigma(I)'
_reflns_Friedel_coverage 0.698
_reflns_Friedel_fraction_max 0.995
_reflns_Friedel_fraction_full 0.999

```

```
_reflns_special_details
```

```
;
```

Reflections were merged by SHELXL according to the crystal class for the calculation of statistics and refinement.

\_reflns\_Friedel\_fraction is defined as the number of unique Friedel pairs measured divided by the number that would be possible theoretically, ignoring centric projections and systematic absences.

```
;
```

```

_computing_data_collection 'Bruker APEX2'
_computing_cell_refinement 'Bruker SAINT'
_computing_data_reduction 'Bruker SAINT'
_computing_structure_solution 'SHELXS-97 (Sheldrick 2008)'
_computing_structure_refinement 'SHELXL-2018/3 (Sheldrick, 2018)'
_computing_molecular_graphics 'Bruker SHELXTL'
_computing_publication_material 'Bruker SHELXTL'
_refine_special_details ?

```

```

_refine_ls_structure_factor_coef Fsqd
_refine_ls_matrix_type          full
_refine_ls_weighting_scheme      calc
_refine_ls_weighting_details
'w=1/[s^2*(Fo^2)+(0.0403P)^2+0.3502P] where P=(Fo^2+2Fc^2)/3'
_atom_sites_solution_primary    ?
_atom_sites_solution_secondary  ?
_atom_sites_solution_hydrogens  geom
_refine_ls_hydrogen_treatment   constr
_refine_ls_extinction_method     none
_refine_ls_extinction_coef       .
_refine_ls_abs_structure_details
;
Flack x determined using 1272 quotients [(I+)-(I-)]/[(I+)+(I-)]
(Parsons, Flack and Wagner, Acta Cryst. B69 (2013) 249-259).
;
_refine_ls_abs_structure_Flack  0.01(4)
_chemical_absolute_configuration ad
_refine_ls_number_reflns        3165
_refine_ls_number_parameters    262
_refine_ls_number_restraints    0
_refine_ls_R_factor_all         0.0279
_refine_ls_R_factor_gt          0.0274
_refine_ls_wR_factor_ref        0.0730
_refine_ls_wR_factor_gt         0.0722
_refine_ls_goodness_of_fit_ref  1.059
_refine_ls_restrained_S_all     1.059
_refine_ls_shift/su_max         0.001
_refine_ls_shift/su_mean        0.000

loop_
  _atom_site_label
  _atom_site_type_symbol
  _atom_site_fract_x
  _atom_site_fract_y
  _atom_site_fract_z
  _atom_site_U_iso_or_equiv
  _atom_site_adp_type
  _atom_site_occupancy
  _atom_site_site_symmetry_order
  _atom_site_calc_flag
  _atom_site_refinement_flags_posn
  _atom_site_refinement_flags_adp
  _atom_site_refinement_flags_occupancy
  _atom_site_disorder_assembly
  _atom_site_disorder_group
F1 F 0.0164(2) -0.03917(17) 0.51190(4) 0.0444(4) Uani 1 1 d . . . . .
F2 F -0.0042(3) 0.5755(2) 0.55101(4) 0.0567(4) Uani 1 1 d . . . . .
O1 O -0.1161(2) 0.1631(2) 0.35270(4) 0.0335(3) Uani 1 1 d . . . . .
O2 O 0.46392(19) 0.1466(2) 0.35597(4) 0.0268(3) Uani 1 1 d . . . . .
O3 O 0.65882(17) 0.1690(2) 0.28808(4) 0.0293(3) Uani 1 1 d . . . . .
H3A H 0.688729 0.171634 0.313157 0.044 Uiso 1 1 calc R U . . . . .
O4 O 0.65367(18) 0.2725(2) 0.20616(4) 0.0274(3) Uani 1 1 d . . . . .
O5 O 0.14108(19) 0.1559(2) 0.13474(4) 0.0308(3) Uani 1 1 d . . . . .

```

N1 N 0.1344(2) 0.0901(2) 0.39038(5) 0.0262(4) Uani 1 1 d . . . . .  
 H1A H 0.254861 0.086895 0.391341 0.031 Uiso 1 1 calc R U . . .  
 N2 N 0.1995(2) 0.2090(2) 0.24623(4) 0.0218(3) Uani 1 1 d . . . . .  
 N3 N 0.4014(2) 0.1581(2) 0.17380(5) 0.0228(3) Uani 1 1 d . . . . .  
 C1 C 0.0241(3) 0.1844(3) 0.45958(6) 0.0246(4) Uani 1 1 d . . . . .  
 C2 C 0.0164(3) 0.1402(3) 0.50118(6) 0.0279(4) Uani 1 1 d . . . . .  
 C3 C 0.0088(3) 0.2672(3) 0.53256(6) 0.0341(5) Uani 1 1 d . . . . .  
 H3B H 0.004873 0.231832 0.560811 0.041 Uiso 1 1 calc R U . . .  
 C4 C 0.0071(3) 0.4470(3) 0.52081(6) 0.0339(5) Uani 1 1 d . . . . .  
 C5 C 0.0151(3) 0.5022(3) 0.48018(7) 0.0337(5) Uani 1 1 d . . . . .  
 H5A H 0.014757 0.628551 0.473144 0.040 Uiso 1 1 calc R U . . .  
 C6 C 0.0238(3) 0.3691(3) 0.44990(6) 0.0284(4) Uani 1 1 d . . . . .  
 H6A H 0.029683 0.405185 0.421715 0.034 Uiso 1 1 calc R U . . .  
 C7 C 0.0306(3) 0.0366(3) 0.42684(6) 0.0295(4) Uani 1 1 d . . . . .  
 H7A H 0.086339 -0.075021 0.438853 0.035 Uiso 1 1 calc R U . . .  
 H7B H -0.096104 0.005798 0.418428 0.035 Uiso 1 1 calc R U . . .  
 C8 C 0.0523(3) 0.1441(3) 0.35538(5) 0.0231(4) Uani 1 1 d . . . . .  
 C9 C 0.1775(2) 0.1742(2) 0.31945(5) 0.0218(4) Uani 1 1 d . . . . .  
 C10 C 0.3732(3) 0.1673(2) 0.32316(5) 0.0218(4) Uani 1 1 d . . . . .  
 C11 C 0.4756(3) 0.1839(2) 0.28477(6) 0.0221(4) Uani 1 1 d . . . . .  
 C12 C 0.3908(2) 0.2040(3) 0.24743(6) 0.0210(4) Uani 1 1 d . . . . .  
 C13 C 0.4951(3) 0.2162(2) 0.20730(6) 0.0222(4) Uani 1 1 d . . . . .  
 C14 C 0.4603(3) 0.1931(3) 0.13069(5) 0.0241(4) Uani 1 1 d . . . . .  
 H14A H 0.468605 0.328174 0.125884 0.029 Uiso 1 1 calc R U . . .  
 C15 C 0.2939(3) 0.1167(3) 0.10801(6) 0.0309(5) Uani 1 1 d . . . . .  
 H15A H 0.278383 0.177317 0.080857 0.037 Uiso 1 1 calc R U . . .  
 H15B H 0.306680 -0.016874 0.103606 0.037 Uiso 1 1 calc R U . . .  
 C16 C 0.2039(3) 0.1151(3) 0.17488(5) 0.0234(4) Uani 1 1 d . . . . .  
 H16A H 0.183536 -0.017098 0.181576 0.028 Uiso 1 1 calc R U . . .  
 C17 C 0.1089(3) 0.2367(3) 0.20593(6) 0.0245(4) Uani 1 1 d . . . . .  
 H17A H 0.118517 0.366621 0.197408 0.029 Uiso 1 1 calc R U . . .  
 H17B H -0.022478 0.204078 0.207874 0.029 Uiso 1 1 calc R U . . .  
 C18 C 0.1001(3) 0.1959(3) 0.28102(6) 0.0225(4) Uani 1 1 d . . . . .  
 H18A H -0.029564 0.201907 0.278994 0.027 Uiso 1 1 calc R U . . .  
 C19 C 0.6398(3) 0.1031(3) 0.11849(6) 0.0306(5) Uani 1 1 d . . . . .  
 H19A H 0.668298 0.133257 0.089668 0.046 Uiso 1 1 calc R U . . .  
 H19B H 0.738163 0.148102 0.136449 0.046 Uiso 1 1 calc R U . . .  
 H19C H 0.628918 -0.029997 0.121472 0.046 Uiso 1 1 calc R U . . .

loop\_

\_atom\_site\_aniso\_label  
 \_atom\_site\_aniso\_U\_11  
 \_atom\_site\_aniso\_U\_22  
 \_atom\_site\_aniso\_U\_33  
 \_atom\_site\_aniso\_U\_23  
 \_atom\_site\_aniso\_U\_13  
 \_atom\_site\_aniso\_U\_12

F1 0.0771(10) 0.0295(6) 0.0266(6) 0.0082(5) 0.0084(6) 0.0046(7)  
 F2 0.0983(13) 0.0410(7) 0.0310(7) -0.0134(6) -0.0002(8) 0.0023(9)  
 O1 0.0228(7) 0.0565(10) 0.0212(7) 0.0020(7) 0.0018(5) 0.0003(7)  
 O2 0.0265(7) 0.0352(7) 0.0187(6) 0.0004(6) -0.0025(5) 0.0018(6)  
 O3 0.0203(7) 0.0484(9) 0.0193(6) 0.0017(6) -0.0020(5) 0.0015(6)  
 O4 0.0235(7) 0.0353(8) 0.0235(6) 0.0011(6) 0.0016(5) -0.0056(6)  
 O5 0.0283(7) 0.0479(9) 0.0161(6) -0.0028(6) -0.0019(5) 0.0008(7)

N1 0.0276(8) 0.0338(9) 0.0173(7) 0.0015(6) 0.0010(6) 0.0018(7)  
 N2 0.0235(8) 0.0255(8) 0.0164(7) 0.0005(6) -0.0003(6) 0.0010(6)  
 N3 0.0227(8) 0.0283(8) 0.0174(7) -0.0003(7) 0.0017(6) -0.0013(6)  
 C1 0.0225(9) 0.0313(10) 0.0199(9) 0.0024(8) 0.0021(7) -0.0004(8)  
 C2 0.0322(10) 0.0282(10) 0.0234(9) 0.0046(8) 0.0031(8) 0.0019(9)  
 C3 0.0451(12) 0.0398(12) 0.0174(9) 0.0031(8) 0.0015(9) 0.0043(10)  
 C4 0.0437(12) 0.0348(11) 0.0232(9) -0.0066(8) 0.0004(9) 0.0015(10)  
 C5 0.0433(12) 0.0276(10) 0.0304(11) 0.0022(8) 0.0013(10) 0.0009(9)  
 C6 0.0341(10) 0.0312(10) 0.0199(9) 0.0052(8) 0.0012(8) 0.0007(9)  
 C7 0.0386(11) 0.0306(10) 0.0192(9) 0.0029(8) 0.0042(9) -0.0032(9)  
 C8 0.0262(10) 0.0258(9) 0.0174(8) -0.0038(7) 0.0007(7) -0.0005(7)  
 C9 0.0241(9) 0.0221(9) 0.0192(9) -0.0016(7) 0.0004(7) 0.0002(7)  
 C10 0.0260(9) 0.0207(9) 0.0187(8) -0.0017(7) -0.0017(7) 0.0019(8)  
 C11 0.0223(9) 0.0219(8) 0.0219(9) -0.0019(7) 0.0000(7) 0.0006(8)  
 C12 0.0210(8) 0.0214(9) 0.0205(9) 0.0005(7) 0.0017(7) 0.0004(7)  
 C13 0.0264(9) 0.0203(8) 0.0199(8) 0.0009(7) 0.0000(7) 0.0009(8)  
 C14 0.0304(10) 0.0258(9) 0.0162(8) 0.0014(7) 0.0028(7) -0.0008(8)  
 C15 0.0319(11) 0.0419(12) 0.0190(9) -0.0033(8) 0.0010(8) -0.0025(9)  
 C16 0.0239(9) 0.0278(9) 0.0184(8) 0.0001(7) -0.0009(7) -0.0022(7)  
 C17 0.0248(9) 0.0305(10) 0.0182(9) 0.0019(7) -0.0019(7) 0.0027(8)  
 C18 0.0218(9) 0.0249(9) 0.0208(9) 0.0000(8) 0.0025(7) 0.0016(7)  
 C19 0.0342(11) 0.0369(11) 0.0206(9) 0.0000(8) 0.0056(8) 0.0024(9)

\_geom\_special\_details

;

All esds (except the esd in the dihedral angle between two l.s. planes)  
 are estimated using the full covariance matrix. The cell esds are taken  
 into account individually in the estimation of esds in distances, angles  
 and torsion angles; correlations between esds in cell parameters are only  
 used when they are defined by crystal symmetry. An approximate (isotropic)  
 treatment of cell esds is used for estimating esds involving l.s. planes.

;

loop\_

\_geom\_bond\_atom\_site\_label\_1

\_geom\_bond\_atom\_site\_label\_2

\_geom\_bond\_distance

\_geom\_bond\_site\_symmetry\_2

\_geom\_bond\_publ\_flag

F1 C2 1.355(2) . ?

F2 C4 1.357(2) . ?

O1 C8 1.240(2) . ?

O2 C10 1.260(2) . ?

O3 C11 1.346(2) . ?

O3 H3A 0.8400 . ?

O4 C13 1.229(2) . ?

O5 C16 1.409(2) . ?

O5 C15 1.440(2) . ?

N1 C8 1.340(2) . ?

N1 C7 1.455(2) . ?

N1 H1A 0.8800 . ?

N2 C18 1.342(2) . ?

N2 C12 1.397(2) . ?

N2 C17 1.476(2) . ?

N3 C13 1.350(2) . ?  
 N3 C16 1.476(2) . ?  
 N3 C14 1.481(2) . ?  
 C1 C6 1.384(3) . ?  
 C1 C2 1.385(3) . ?  
 C1 C7 1.513(3) . ?  
 C2 C3 1.375(3) . ?  
 C3 C4 1.367(3) . ?  
 C3 H3B 0.9500 . ?  
 C4 C5 1.376(3) . ?  
 C5 C6 1.381(3) . ?  
 C5 H5A 0.9500 . ?  
 C6 H6A 0.9500 . ?  
 C7 H7A 0.9900 . ?  
 C7 H7B 0.9900 . ?  
 C8 C9 1.495(2) . ?  
 C9 C18 1.374(2) . ?  
 C9 C10 1.435(3) . ?  
 C10 C11 1.454(3) . ?  
 C11 C12 1.365(3) . ?  
 C12 C13 1.507(3) . ?  
 C14 C19 1.518(3) . ?  
 C14 C15 1.525(3) . ?  
 C14 H14A 1.0000 . ?  
 C15 H15A 0.9900 . ?  
 C15 H15B 0.9900 . ?  
 C16 C17 1.509(3) . ?  
 C16 H16A 1.0000 . ?  
 C17 H17A 0.9900 . ?  
 C17 H17B 0.9900 . ?  
 C18 H18A 0.9500 . ?  
 C19 H19A 0.9800 . ?  
 C19 H19B 0.9800 . ?  
 C19 H19C 0.9800 . ?

loop\_  
 \_geom\_angle\_atom\_site\_label\_1  
 \_geom\_angle\_atom\_site\_label\_2  
 \_geom\_angle\_atom\_site\_label\_3  
 \_geom\_angle  
 \_geom\_angle\_site\_symmetry\_1  
 \_geom\_angle\_site\_symmetry\_3  
 \_geom\_angle\_publ\_flag  
 C11 O3 H3A 109.5 . . ?  
 C16 O5 C15 105.01(14) . . ?  
 C8 N1 C7 122.03(17) . . ?  
 C8 N1 H1A 119.0 . . ?  
 C7 N1 H1A 119.0 . . ?  
 C18 N2 C12 121.00(15) . . ?  
 C18 N2 C17 120.50(15) . . ?  
 C12 N2 C17 118.45(15) . . ?  
 C13 N3 C16 122.86(15) . . ?  
 C13 N3 C14 123.66(15) . . ?  
 C16 N3 C14 110.05(14) . . ?

C6 C1 C2 116.53(18) . . ?  
 C6 C1 C7 122.45(17) . . ?  
 C2 C1 C7 121.02(18) . . ?  
 F1 C2 C3 117.55(17) . . ?  
 F1 C2 C1 118.28(17) . . ?  
 C3 C2 C1 124.17(19) . . ?  
 C4 C3 C2 116.26(18) . . ?  
 C4 C3 H3B 121.9 . . ?  
 C2 C3 H3B 121.9 . . ?  
 F2 C4 C3 117.69(19) . . ?  
 F2 C4 C5 119.2(2) . . ?  
 C3 C4 C5 123.14(19) . . ?  
 C4 C5 C6 118.23(19) . . ?  
 C4 C5 H5A 120.9 . . ?  
 C6 C5 H5A 120.9 . . ?  
 C5 C6 C1 121.68(18) . . ?  
 C5 C6 H6A 119.2 . . ?  
 C1 C6 H6A 119.2 . . ?  
 N1 C7 C1 113.07(16) . . ?  
 N1 C7 H7A 109.0 . . ?  
 C1 C7 H7A 109.0 . . ?  
 N1 C7 H7B 109.0 . . ?  
 C1 C7 H7B 109.0 . . ?  
 H7A C7 H7B 107.8 . . ?  
 O1 C8 N1 122.36(17) . . ?  
 O1 C8 C9 122.38(16) . . ?  
 N1 C8 C9 115.22(16) . . ?  
 C18 C9 C10 119.29(16) . . ?  
 C18 C9 C8 117.93(16) . . ?  
 C10 C9 C8 122.61(16) . . ?  
 O2 C10 C9 126.72(17) . . ?  
 O2 C10 C11 117.33(16) . . ?  
 C9 C10 C11 115.94(16) . . ?  
 O3 C11 C12 121.99(16) . . ?  
 O3 C11 C10 115.84(15) . . ?  
 C12 C11 C10 122.09(17) . . ?  
 C11 C12 N2 118.73(16) . . ?  
 C11 C12 C13 122.64(17) . . ?  
 N2 C12 C13 118.62(16) . . ?  
 O4 C13 N3 123.93(17) . . ?  
 O4 C13 C12 121.41(16) . . ?  
 N3 C13 C12 114.65(16) . . ?  
 N3 C14 C19 114.89(15) . . ?  
 N3 C14 C15 99.11(14) . . ?  
 C19 C14 C15 113.85(16) . . ?  
 N3 C14 H14A 109.5 . . ?  
 C19 C14 H14A 109.5 . . ?  
 C15 C14 H14A 109.5 . . ?  
 O5 C15 C14 104.82(14) . . ?  
 O5 C15 H15A 110.8 . . ?  
 C14 C15 H15A 110.8 . . ?  
 O5 C15 H15B 110.8 . . ?  
 C14 C15 H15B 110.8 . . ?  
 H15A C15 H15B 108.9 . . ?

O5 C16 N3 104.53(14) . . ?  
 O5 C16 C17 109.83(15) . . ?  
 N3 C16 C17 109.84(15) . . ?  
 O5 C16 H16A 110.8 . . ?  
 N3 C16 H16A 110.8 . . ?  
 C17 C16 H16A 110.8 . . ?  
 N2 C17 C16 107.51(15) . . ?  
 N2 C17 H17A 110.2 . . ?  
 C16 C17 H17A 110.2 . . ?  
 N2 C17 H17B 110.2 . . ?  
 C16 C17 H17B 110.2 . . ?  
 H17A C17 H17B 108.5 . . ?  
 N2 C18 C9 122.95(17) . . ?  
 N2 C18 H18A 118.5 . . ?  
 C9 C18 H18A 118.5 . . ?  
 C14 C19 H19A 109.5 . . ?  
 C14 C19 H19B 109.5 . . ?  
 H19A C19 H19B 109.5 . . ?  
 C14 C19 H19C 109.5 . . ?  
 H19A C19 H19C 109.5 . . ?  
 H19B C19 H19C 109.5 . . ?

loop\_

\_geom\_torsion\_atom\_site\_label\_1  
 \_geom\_torsion\_atom\_site\_label\_2  
 \_geom\_torsion\_atom\_site\_label\_3  
 \_geom\_torsion\_atom\_site\_label\_4  
 \_geom\_torsion  
 \_geom\_torsion\_site\_symmetry\_1  
 \_geom\_torsion\_site\_symmetry\_2  
 \_geom\_torsion\_site\_symmetry\_3  
 \_geom\_torsion\_site\_symmetry\_4  
 \_geom\_torsion\_publ\_flag  
 C6 C1 C2 F1 180.00(19) . . . . ?  
 C7 C1 C2 F1 0.6(3) . . . . ?  
 C6 C1 C2 C3 -0.1(3) . . . . ?  
 C7 C1 C2 C3 -179.5(2) . . . . ?  
 F1 C2 C3 C4 -179.4(2) . . . . ?  
 C1 C2 C3 C4 0.7(4) . . . . ?  
 C2 C3 C4 F2 178.7(2) . . . . ?  
 C2 C3 C4 C5 -0.9(4) . . . . ?  
 F2 C4 C5 C6 -179.0(2) . . . . ?  
 C3 C4 C5 C6 0.5(4) . . . . ?  
 C4 C5 C6 C1 0.1(4) . . . . ?  
 C2 C1 C6 C5 -0.3(3) . . . . ?  
 C7 C1 C6 C5 179.0(2) . . . . ?  
 C8 N1 C7 C1 -101.8(2) . . . . ?  
 C6 C1 C7 N1 32.6(3) . . . . ?  
 C2 C1 C7 N1 -148.08(19) . . . . ?  
 C7 N1 C8 O1 4.7(3) . . . . ?  
 C7 N1 C8 C9 -173.43(16) . . . . ?  
 O1 C8 C9 C18 -10.1(3) . . . . ?  
 N1 C8 C9 C18 168.05(17) . . . . ?  
 O1 C8 C9 C10 174.70(19) . . . . ?



N1 C8 C9 C10 -7.2(3) . . . . ?  
 C18 C9 C10 O2 -179.37(18) . . . . ?  
 C8 C9 C10 O2 -4.2(3) . . . . ?  
 C18 C9 C10 C11 -0.2(3) . . . . ?  
 C8 C9 C10 C11 174.96(16) . . . . ?  
 O2 C10 C11 O3 2.2(2) . . . . ?  
 C9 C10 C11 O3 -177.07(16) . . . . ?  
 O2 C10 C11 C12 179.00(18) . . . . ?  
 C9 C10 C11 C12 -0.3(3) . . . . ?  
 O3 C11 C12 N2 176.70(17) . . . . ?  
 C10 C11 C12 N2 0.1(3) . . . . ?  
 O3 C11 C12 C13 -1.7(3) . . . . ?  
 C10 C11 C12 C13 -178.30(16) . . . . ?  
 C18 N2 C12 C11 0.6(3) . . . . ?  
 C17 N2 C12 C11 178.06(16) . . . . ?  
 C18 N2 C12 C13 179.01(16) . . . . ?  
 C17 N2 C12 C13 -3.5(2) . . . . ?  
 C16 N3 C13 O4 -171.40(17) . . . . ?  
 C14 N3 C13 O4 -14.4(3) . . . . ?  
 C16 N3 C13 C12 9.7(3) . . . . ?  
 C14 N3 C13 C12 166.71(16) . . . . ?  
 C11 C12 C13 O4 -26.0(3) . . . . ?  
 N2 C12 C13 O4 155.58(18) . . . . ?  
 C11 C12 C13 N3 152.89(18) . . . . ?  
 N2 C12 C13 N3 -25.5(2) . . . . ?  
 C13 N3 C14 C19 64.4(2) . . . . ?  
 C16 N3 C14 C19 -136.01(17) . . . . ?  
 C13 N3 C14 C15 -173.83(18) . . . . ?  
 C16 N3 C14 C15 -14.28(19) . . . . ?  
 C16 O5 C15 C14 -42.22(19) . . . . ?  
 N3 C14 C15 O5 33.47(18) . . . . ?  
 C19 C14 C15 O5 155.95(16) . . . . ?  
 C15 O5 C16 N3 31.90(19) . . . . ?  
 C15 O5 C16 C17 149.68(16) . . . . ?  
 C13 N3 C16 O5 149.70(17) . . . . ?  
 C14 N3 C16 O5 -10.0(2) . . . . ?  
 C13 N3 C16 C17 31.9(2) . . . . ?  
 C14 N3 C16 C17 -127.83(16) . . . . ?  
 C18 N2 C17 C16 -138.09(17) . . . . ?  
 C12 N2 C17 C16 44.4(2) . . . . ?  
 O5 C16 C17 N2 -171.32(14) . . . . ?  
 N3 C16 C17 N2 -56.88(19) . . . . ?  
 C12 N2 C18 C9 -1.0(3) . . . . ?  
 C17 N2 C18 C9 -178.51(17) . . . . ?  
 C10 C9 C18 N2 0.8(3) . . . . ?  
 C8 C9 C18 N2 -174.53(17) . . . . ?

loop\_

\_geom\_hbond\_atom\_site\_label\_D  
 \_geom\_hbond\_atom\_site\_label\_H  
 \_geom\_hbond\_atom\_site\_label\_A  
 \_geom\_hbond\_distance\_DH  
 \_geom\_hbond\_distance\_HA  
 \_geom\_hbond\_distance\_DA

```

_geom_hbond_angle_DHA
_geom_hbond_site_symmetry_A
_geom_hbond_publ_flag
O3 H3A O1 0.84 1.92 2.6587(18) 146.8 1_655 yes
O3 H3A O2 0.84 2.16 2.6215(18) 114.9 . yes
N1 H1A O2 0.88 1.96 2.682(2) 138.8 . yes

_refine_diff_density_max 0.157
_refine_diff_density_min -0.172
_refine_diff_density_rms 0.036

_shelx_res_file
;
TITL GSK744 in P2(1)2(1)2(1)
570.res
created by SHELXL-2018/3 at 13:58:58 on 02-Jan-2019
CELL 1.54178 7.3002 7.3002 32.3426 90.000 90.000 90.000
ZERR 4.000 0.0005 0.0001 0.0021 0.000 0.000 0.000
LATT -1
SYMM 1/2-X, -Y, 1/2+Z
SYMM -X, 1/2+Y, 1/2-Z
SYMM 1/2+X, 1/2-Y, -Z
SFAC C H N O F
UNIT 76 68 12 20 8
TEMP -90.730
L.S. 4

ACTA
BOND $H
CONF
EQUIV $1 x+1, y, z
HTAB O3 O1_$1
HTAB O3 O2
HTAB N1 O2
SIZE 0.08 0.14 0.26
FMAP 2
PLAN 10
WGHT 0.040300 0.350200
FVAR 0.93199
F1 5 0.016443 -0.039173 0.511896 11.00000 0.07714 0.02946 =
0.02657 0.00817 0.00840 0.00455
F2 5 -0.004212 0.575509 0.551009 11.00000 0.09829 0.04096 =
0.03100 -0.01336 -0.00023 0.00232
O1 4 -0.116125 0.163073 0.352701 11.00000 0.02276 0.05649 =
0.02118 0.00203 0.00184 0.00035
O2 4 0.463921 0.146615 0.355974 11.00000 0.02647 0.03521 =
0.01872 0.00042 -0.00251 0.00180
O3 4 0.658824 0.169045 0.288085 11.00000 0.02031 0.04843 =
0.01931 0.00174 -0.00197 0.00149
AFIX 83
H3A 2 0.688729 0.171634 0.313157 11.00000 -1.50000
AFIX 0
O4 4 0.653674 0.272540 0.206158 11.00000 0.02351 0.03526 =
0.02345 0.00105 0.00160 -0.00560

```

O5 4 0.141079 0.155907 0.134745 11.00000 0.02835 0.04792 =  
 0.01615 -0.00279 -0.00195 0.00081  
 N1 3 0.134435 0.090094 0.390379 11.00000 0.02757 0.03379 =  
 0.01725 0.00151 0.00099 0.00183  
 AFIX 43  
 H1A 2 0.254861 0.086895 0.391341 11.00000 -1.20000  
 AFIX 0  
 N2 3 0.199543 0.209005 0.246231 11.00000 0.02353 0.02547 =  
 0.01641 0.00053 -0.00033 0.00103  
 N3 3 0.401392 0.158117 0.173796 11.00000 0.02267 0.02832 =  
 0.01740 -0.00029 0.00172 -0.00133  
 C1 1 0.024147 0.184408 0.459584 11.00000 0.02247 0.03133 =  
 0.01993 0.00240 0.00210 -0.00044  
 C2 1 0.016379 0.140236 0.501178 11.00000 0.03218 0.02815 =  
 0.02337 0.00464 0.00306 0.00193  
 C3 1 0.008757 0.267174 0.532556 11.00000 0.04514 0.03979 =  
 0.01738 0.00314 0.00150 0.00432  
 AFIX 43  
 H3B 2 0.004873 0.231832 0.560811 11.00000 -1.20000  
 AFIX 0  
 C4 1 0.007085 0.446980 0.520810 11.00000 0.04372 0.03477 =  
 0.02320 -0.00656 0.00041 0.00148  
 C5 1 0.015142 0.502212 0.480184 11.00000 0.04329 0.02758 =  
 0.03035 0.00216 0.00125 0.00088  
 AFIX 43  
 H5A 2 0.014757 0.628551 0.473144 11.00000 -1.20000  
 AFIX 0  
 C6 1 0.023807 0.369077 0.449904 11.00000 0.03410 0.03124 =  
 0.01994 0.00516 0.00116 0.00065  
 AFIX 43  
 H6A 2 0.029683 0.405185 0.421715 11.00000 -1.20000  
 AFIX 0  
 C7 1 0.030610 0.036564 0.426837 11.00000 0.03859 0.03064 =  
 0.01922 0.00292 0.00421 -0.00318  
 AFIX 23  
 H7A 2 0.086339 -0.075021 0.438853 11.00000 -1.20000  
 H7B 2 -0.096104 0.005798 0.418428 11.00000 -1.20000  
 AFIX 0  
 C8 1 0.052294 0.144122 0.355379 11.00000 0.02618 0.02576 =  
 0.01738 -0.00384 0.00075 -0.00048  
 C9 1 0.177526 0.174164 0.319446 11.00000 0.02414 0.02205 =  
 0.01922 -0.00160 0.00038 0.00020  
 C10 1 0.373247 0.167317 0.323160 11.00000 0.02605 0.02066 =  
 0.01874 -0.00172 -0.00171 0.00190  
 C11 1 0.475635 0.183925 0.284768 11.00000 0.02234 0.02191 =  
 0.02195 -0.00186 0.00003 0.00062  
 C12 1 0.390837 0.204031 0.247433 11.00000 0.02101 0.02140 =  
 0.02051 0.00049 0.00171 0.00036  
 C13 1 0.495054 0.216248 0.207301 11.00000 0.02636 0.02028 =  
 0.01994 0.00091 -0.00003 0.00090  
 C14 1 0.460328 0.193111 0.130693 11.00000 0.03041 0.02576 =  
 0.01621 0.00142 0.00280 -0.00078  
 AFIX 13  
 H14A 2 0.468605 0.328174 0.125884 11.00000 -1.20000

```

AFIX 0
C15 1 0.293948 0.116719 0.108014 11.00000 0.03186 0.04192 =
      0.01898 -0.00331 0.00104 -0.00252
AFIX 23
H15A 2 0.278383 0.177317 0.080857 11.00000 -1.20000
H15B 2 0.306680 -0.016874 0.103606 11.00000 -1.20000
AFIX 0
C16 1 0.203863 0.115080 0.174880 11.00000 0.02392 0.02784 =
      0.01841 0.00008 -0.00092 -0.00222
AFIX 13
H16A 2 0.183536 -0.017098 0.181576 11.00000 -1.20000
AFIX 0
C17 1 0.108864 0.236734 0.205935 11.00000 0.02478 0.03053 =
      0.01817 0.00194 -0.00190 0.00274
AFIX 23
H17A 2 0.118517 0.366621 0.197408 11.00000 -1.20000
H17B 2 -0.022478 0.204078 0.207874 11.00000 -1.20000
AFIX 0
C18 1 0.100119 0.195894 0.281023 11.00000 0.02180 0.02492 =
      0.02078 0.00002 0.00252 0.00155
AFIX 43
H18A 2 -0.029564 0.201907 0.278994 11.00000 -1.20000
AFIX 0
C19 1 0.639831 0.103147 0.118489 11.00000 0.03421 0.03693 =
      0.02062 0.00002 0.00555 0.00236
AFIX 33
H19A 2 0.668298 0.133257 0.089668 11.00000 -1.50000
H19B 2 0.738163 0.148102 0.136449 11.00000 -1.50000
H19C 2 0.628918 -0.029997 0.121472 11.00000 -1.50000

AFIX 0
HKL 4

```

```

REM GSK744 in P2(1)2(1)2(1)
REM wR2 = 0.0730, GooF = S = 1.059, Restrained GooF = 1.059 for all data
REM R1 = 0.0274 for 3114 Fo > 4sig(Fo) and 0.0279 for all 3165 data
REM 262 parameters refined using 0 restraints

```

END

```

WGHT 0.0403 0.3502

```

```

REM Highest difference peak 0.157, deepest hole -0.172, 1-sigma level 0.036
Q1 1 0.4407 0.1689 0.1538 11.00000 0.05 0.16
Q2 1 0.4416 0.2155 0.2299 11.00000 0.05 0.15
Q3 1 0.1538 0.1690 0.1924 11.00000 0.05 0.15
Q4 1 0.6253 0.0833 0.0827 11.00000 0.05 0.14
Q5 1 0.0577 0.1639 0.4779 11.00000 0.05 0.13
Q6 1 0.7250 0.2382 0.1735 11.00000 0.05 0.13
Q7 1 0.2560 0.1247 0.3217 11.00000 0.05 0.13
Q8 1 0.0728 0.4627 0.5002 11.00000 0.05 0.13

```

```

Q9  1  0.1242 0.1580 0.3344 11.00000 0.05  0.13
Q10 1  0.0809 0.2655 0.4547 11.00000 0.05  0.12
;
_shelx_res_checksum  51281
;
_shelx_hkl_checksum  2642

```

## checkCIF/PLATON report

Structure factors have been supplied for datablock(s) 570

THIS REPORT IS FOR GUIDANCE ONLY. IF USED AS PART OF A REVIEW PROCEDURE FOR PUBLICATION, IT SHOULD NOT REPLACE THE EXPERTISE OF AN EXPERIENCED CRYSTALLOGRAPHIC REFEREE.

No syntax errors found.   CIF dictionary   Interpreting this report

## Datablock: 570

---

|                 |                          |                         |
|-----------------|--------------------------|-------------------------|
| Bond precision: | C-C = 0.0029 Å           | Wavelength=1.54178      |
| Cell:           | a=7.3002 (5)<br>alpha=90 | b=7.3002 (1)<br>beta=90 |
| Temperature:    | c=32.343 (2)<br>gamma=90 | 182 K                   |

  

|                        | Calculated       | Reported         |
|------------------------|------------------|------------------|
| Volume                 | 1723.65 (16)     | 1723.63 (16)     |
| Space group            | P 21 21 21       | P 21 21 21       |
| Hall group             | P 2ac 2ab        | P 2ac 2ab        |
| Moiety formula         | C19 H17 F2 N3 O5 | C19 H17 F2 N3 O5 |
| Sum formula            | C19 H17 F2 N3 O5 | C19 H17 F2 N3 O5 |
| Mr                     | 405.36           | 405.35           |
| Dx, g cm <sup>-3</sup> | 1.562            | 1.562            |
| Z                      | 4                | 4                |
| Mu (mm <sup>-1</sup> ) | 1.103            | 1.103            |
| F000                   | 840.0            | 840.0            |
| F000'                  | 843.17           |                  |
| h, k, lmax             | 8, 8, 39         | 8, 8, 39         |
| Nref                   | 3185 [ 1877]     | 3165             |
| Tmin, Tmax             | 0.831, 0.916     | 0.637, 0.753     |
| Tmin'                  | 0.751            |                  |

Correction method= # Reported T Limits: Tmin=0.637 Tmax=0.753  
AbsCorr = MULTI-SCAN

Data completeness= 1.69/0.99                      Theta(max)= 68.809

R(reflections)= 0.0274( 3114)

wR2(reflections)=  
0.0730( 3165)

S = 1.059

Npar= 262

---

The following ALERTS were generated. Each ALERT has the format

**test-name\_ALERT\_alert-type\_alert-level.**

Click on the hyperlinks for more details of the test.

---

### Alert level B

SYMMS02\_ALERT\_1\_B The unit-cell lengths a and b should not be equal for anorthorhombic cell

|        |         |         |         |
|--------|---------|---------|---------|
| Cell   | 7.3002  | 7.3002  | 32.3430 |
| Angles | 90.0000 | 90.0000 | 90.0000 |

---

### Alert level C

PLAT089\_ALERT\_3\_C Poor Data / Parameter Ratio (Zmax < 18) .....

7.11 Note PLAT911\_ALERT\_3\_C

Missing FCF Refl Between Thmin & STh/L=

0.600

10 Report

PLAT913\_ALERT\_3\_C Missing # of Very Strong Reflections in FCF ....

6 Note

---

### Alert level G

PLAT007\_ALERT\_5\_G Number of Unrefined Donor-H Atoms ..... 2 Report PLAT398\_ALERT\_2\_G Deviating C-O-C Angle From 120 for O5 . 105.0 Degree PLAT883\_ALERT\_1\_G No Info/Value for \_atom\_sites\_solution\_primary . Please Do !

PLAT899\_ALERT\_4\_G SHELXL2018 is Deprecated and Succeeded by SHELXL

2019/3 Note

PLAT910\_ALERT\_3\_G Missing # of FCF Reflection(s) Below Theta(Min).

1 Note

PLAT912\_ALERT\_4\_G Missing # of FCF Reflections Above STh/L= 0.600

1 Note

PLAT955\_ALERT\_1\_G Reported (CIF) and Actual (FCF) Lmax Differ by .

1 Units

PLAT978\_ALERT\_2\_G Number C-C Bonds with Positive Residual Density.

10 Info

---

0 **ALERT level A** = Most likely a serious problem - resolve or explain

1 **ALERT level B** = A potentially serious problem, consider carefully

3 **ALERT level C** = Check. Ensure it is not caused by an omission or oversight

8 **ALERT level G** = General information/check it is not something unexpected

3 ALERT type 1 CIF construction/syntax error, inconsistent or missing data

2 ALERT type 2 Indicator that the structure model may be wrong or deficient

4 ALERT type 3 Indicator that the structure quality may be low

2 ALERT type 4 Improvement, methodology, query or suggestion

1 ALERT type 5 Informative message, check

---

---

PLATON version of 06/07/2023; check.def file  
version of 30/06/2023

**Datablock 570** - ellipsoid plot

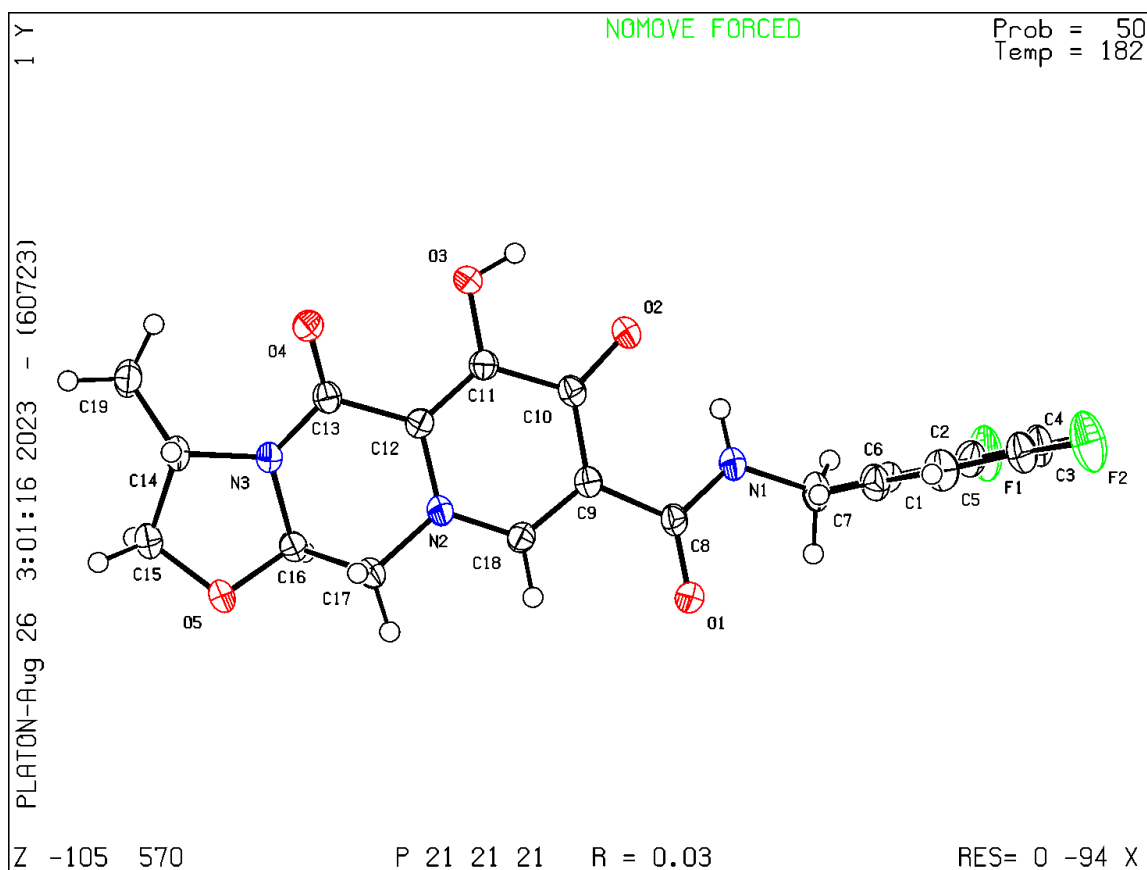

Supplement: s1 [file s1]
